# Supplementary material for: Highly conducting 1-D polypyrrole prepared in the presence of safranin
Source: Royal Society of Chemistry journal article supplement (doi:10.1039/d0tc02838j), 2020-01-01
Supplement: d0tc02838j1.pdf [file d0tc02838j1.pdf]

**Supporting information**

**Highly conducting 1-D polypyrrole prepared in the presence of safranin**

Islam M. Minisy<sup>a,b</sup>, Udit Acharya<sup>a,c</sup>, Libor Kobera<sup>a</sup>, Miroslava Trchová<sup>a,d</sup>, Christoph Unterweger<sup>e</sup>, Stefan Breitenbach<sup>e</sup>, Jiří Brus<sup>a</sup>, Jiří Pflieger<sup>a</sup>, Jaroslav Stejskal<sup>a</sup>, Patrycja Bober<sup>a,\*</sup>

<sup>a</sup> *Institute of Macromolecular Chemistry, Academy of Sciences of the Czech Republic, 162 06 Prague 6, Czech Republic*

<sup>b</sup> *Charles University, Faculty of Science, 128 43 Prague 2, Czech Republic*

<sup>c</sup> *Charles University, Faculty of Mathematics and Physics, 121 16 Prague 2, Czech Republic*

<sup>d</sup> *University of Chemistry and Technology Prague, 166 28 Prague 6, Czech Republic*

<sup>e</sup> *Wood K Plus – Kompetenzzentrum Holz GmbH, 4040 Linz, Austria*

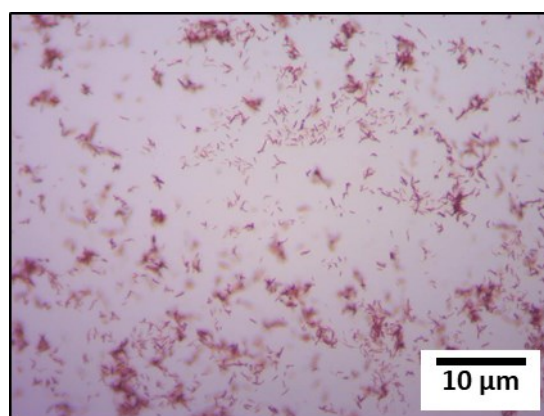

**Fig. S1.** Optical micrograph of fibrillary aggregates of safranin when mixed with iron(III) chloride solution.

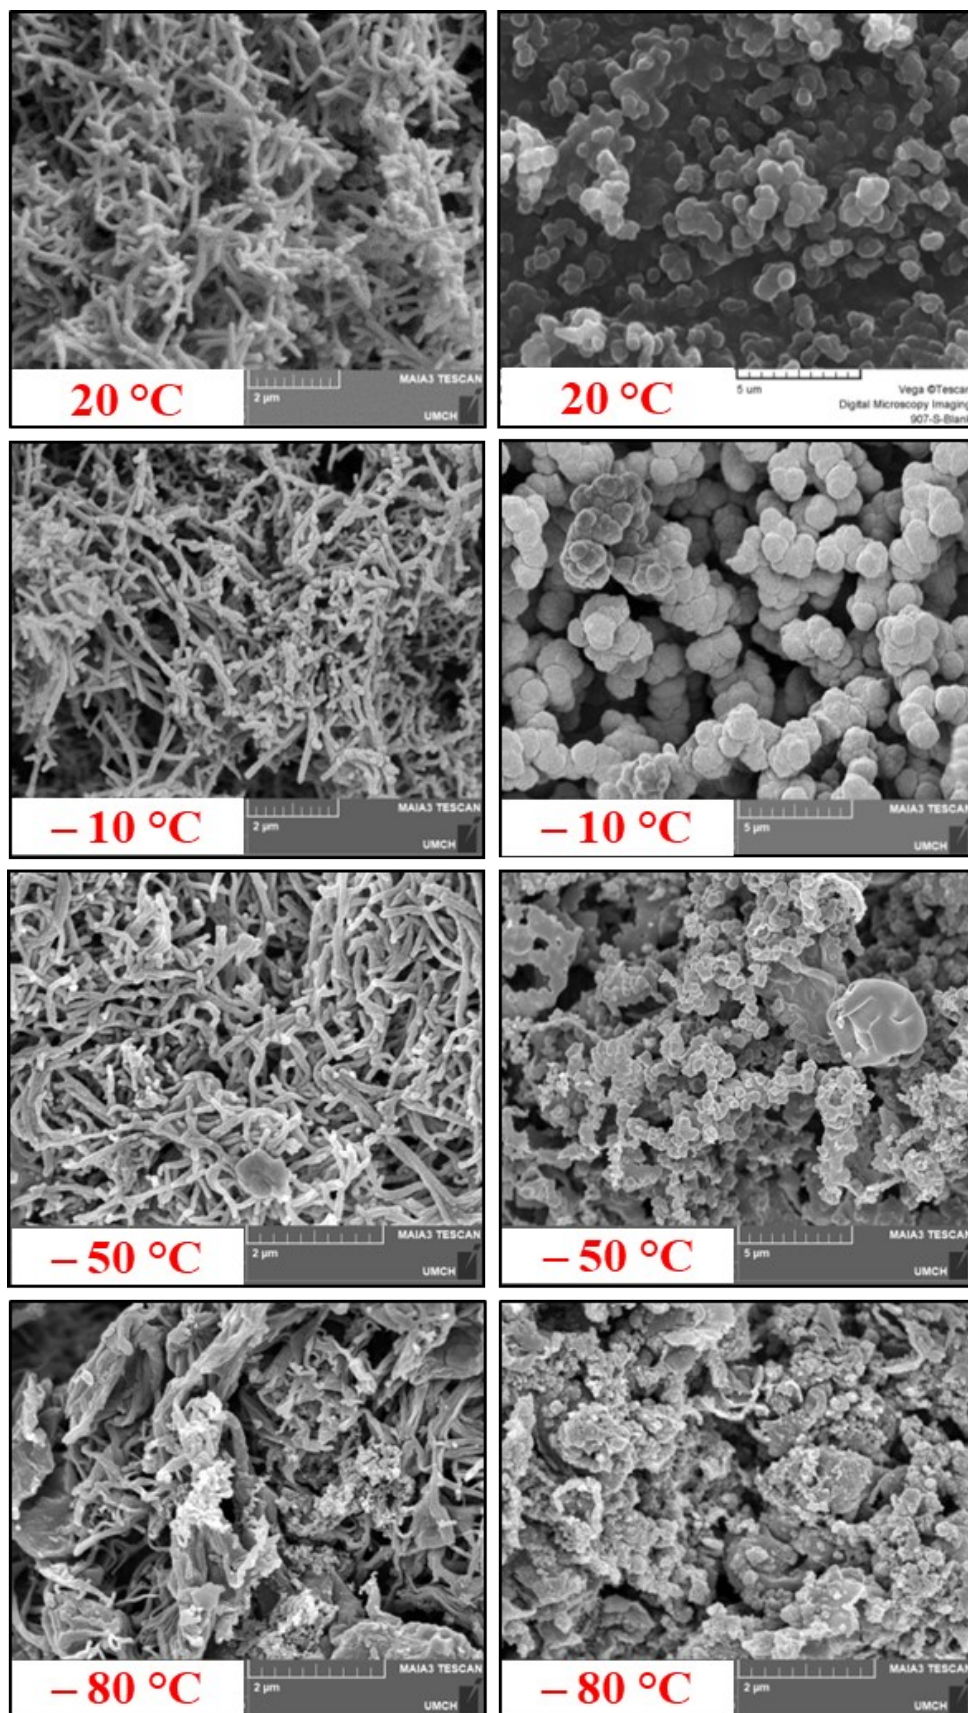

**Fig. S2.** SEM micrographs of polypyrrole prepared at different temperatures in the presence of safranin (left), and globular dye-free polypyrrole (right).

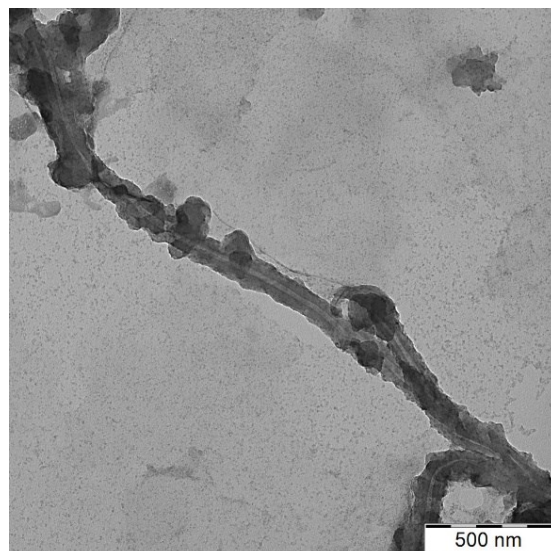

**Fig. S3.** TEM micrograph of polypyrrole prepared in the presence of safranin at  $-80\text{ }^{\circ}\text{C}$ .

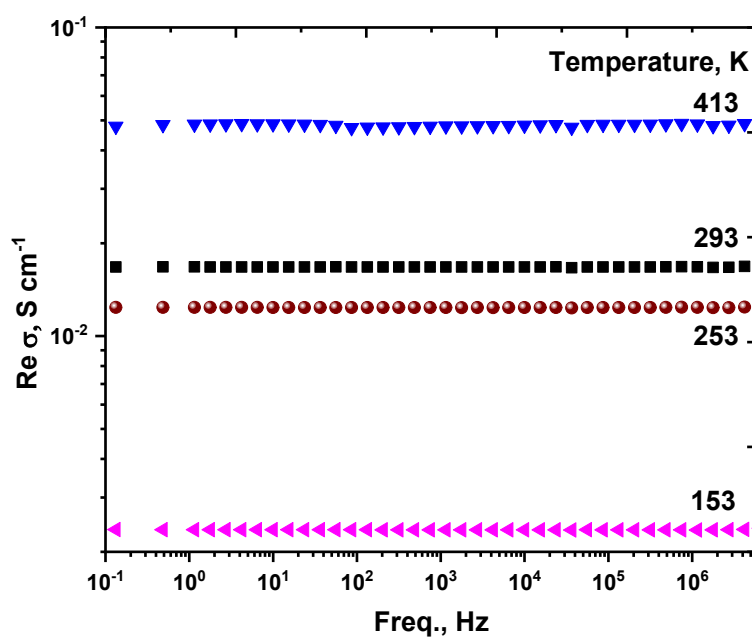

**Fig. S4.** Frequency dependence of conductivity at different temperatures of 1-D polypyrrole prepared in the presence of safranin at  $-24\text{ }^{\circ}\text{C}$ .

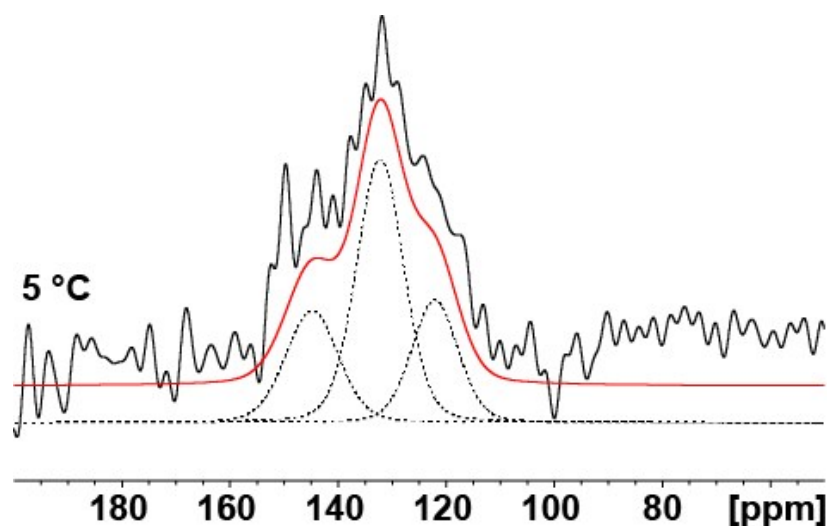

**Fig. S5.** Experimental  $^{15}\text{N}$  CP/MAS NMR spectrum (black solid line), simulations of the individual nitrogen atoms (dashed lines) and their sum (red solid line) of prepared and deprotonated polypyrrole sample.

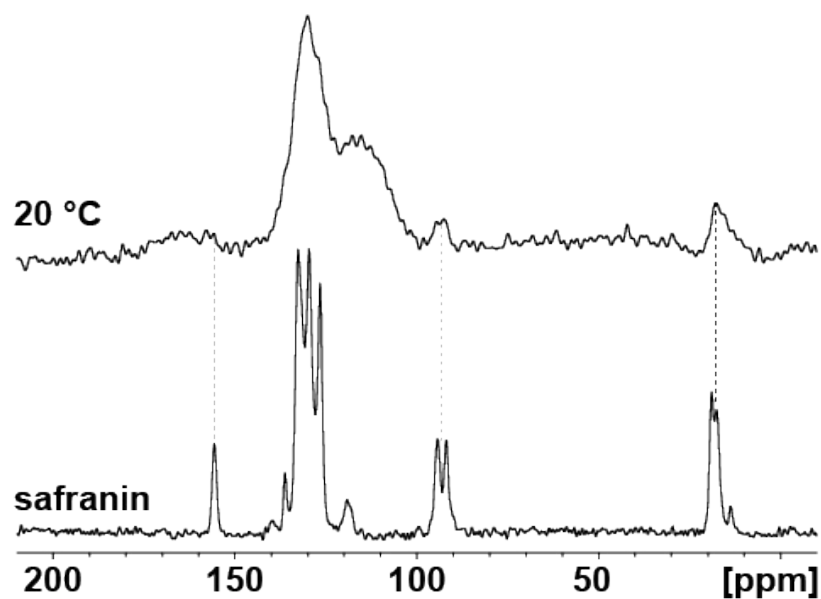

**Fig. S6.** The comparison of experimental  $^{13}\text{C}$  CP/MAS NMR spectra of safranin with polypyrrole prepared in the presence of safranin at 20 °C.
